# Supplementary material for: Limited Phylogeographic Signal in Sex-Linked and Autosomal Loci Despite Geographically, Ecologically, and Phenotypically Concordant Structure of mtDNA Variation in the Holarctic Avian Genus Eremophila
Source: PubMed Central journal article supplement (PMC3907499; doi:10.1371/journal.pone.0087570), 2014-01-30
Supplement: pone.0087570.s001.pdf [file pone.0087570.s001.pdf]

Appendix S1. Samples used in this study and GenBank accession numbers

| ID         | Institution       | Species                          | mtDNA clade        | Sex | Date      | Lat.  | Lon.   | ND2      | ACO1               | RHO                |
|------------|-------------------|----------------------------------|--------------------|-----|-----------|-------|--------|----------|--------------------|--------------------|
| SVD2112    | UWBM 64797        | <i>Calandrella brachydactyla</i> | <i>Calandrella</i> | M   | 14-Jul-99 | 43.90 | 40.78  | KF735312 | KF735211, KF735212 | KF735505, KF735506 |
| CDS4814    | UWBM 46251        | <i>Calandrella brachydactyla</i> | <i>Calandrella</i> | F   | 19-May-93 | 43.83 | 76.35  | KF735311 |                    |                    |
| SVD1138    | UWBM 56909        | <i>Calandrella brachydactyla</i> | <i>Calandrella</i> | F   | 2-Jun-96  | 46.22 | 47.77  | KF735313 | KF735213           | KF735507, KF735508 |
| NHMUO17026 | NHMUO 17026       | <i>Eremophila alpestris</i>      | <i>ehwesi</i>      |     | 15-Jul-06 | 30.26 | 90.66  | KF735315 | KF735214, KF735215 | KF735509, KF735510 |
| NHMUO17038 | NHMUO 17038       | <i>Eremophila alpestris</i>      | <i>ehwesi</i>      |     | 14-Jul-06 | 30.74 | 90.95  | KF735314 | KF735216           | KF735511, KF735512 |
| AGB1       | U. de Montpellier | <i>Eremophila bilopha</i>        | <i>bilopha</i>     | M   |           | 34.03 | 353.15 | KF735318 | KF735217, KF735218 | KF735527, KF735528 |
| AGB2       | U. de Montpellier | <i>Eremophila bilopha</i>        | <i>bilopha</i>     | M   |           | 34.03 | 353.15 | KF735319 | KF735219, KF735220 | KF735531, KF735532 |
| AGB3       | U. de Montpellier | <i>Eremophila bilopha</i>        | <i>bilopha</i>     |     |           | 34.03 | 353.15 | KF735320 | KF735221           | KF735533, KF735534 |
| ZMUC135714 | ZMUC 135714       | <i>Eremophila bilopha</i>        | <i>bilopha</i>     |     |           | 36.78 | 10.17  | KF735316 |                    |                    |
| ZMUC135715 | ZMUC 135715       | <i>Eremophila bilopha</i>        | <i>bilopha</i>     |     |           | 36.78 | 10.17  | KF735317 | KF735222           |                    |
| AGA1       | U. de Montpellier | <i>Eremophila alpestris</i>      | <i>atlas</i>       | M   |           | 34.03 | 353.15 | KF735321 | KF735223, KF735224 | KF735525, KF735526 |
| AGA2       | U. de Montpellier | <i>Eremophila alpestris</i>      | <i>atlas</i>       |     |           | 34.03 | 353.15 | KF735322 | KF735225           | KF735529, KF735530 |
| MR1061     | NHMB              | <i>Eremophila alpestris</i>      | <i>penicillata</i> | M   | 5-Aug-10  | 43.31 | 22.86  | KF735442 | KF735226, KF735227 | KF735583, KF735584 |
| MR1062     | NHMB              | <i>Eremophila alpestris</i>      | <i>penicillata</i> | M   | 5-Aug-10  | 43.31 | 22.86  | KF735443 | KF735228, KF735229 | KF735585, KF735586 |
| MR0950     | NHMB              | <i>Eremophila alpestris</i>      | <i>penicillata</i> | M   | 18-Jun-10 | 40.47 | 44.19  | KF735444 | KF735230, KF735231 | KF735575, KF735576 |
| MR0951     | NHMB              | <i>Eremophila alpestris</i>      | <i>penicillata</i> | M   | 18-Jun-10 | 40.47 | 44.19  | KF735445 | KF735232, KF735233 | KF735577, KF735578 |
| MR0952     | NHMB              | <i>Eremophila alpestris</i>      | <i>penicillata</i> | M   | 18-Jun-10 | 40.47 | 44.19  | KF735446 | KF735234, KF735235 | KF735579, KF735580 |
| MR0953     | NHMB              | <i>Eremophila alpestris</i>      | <i>penicillata</i> | M   | 18-Jun-10 | 40.47 | 44.19  | KF735447 | KF735236, KF735237 | KF735581, KF735582 |
| IVF1021    | SDM               | <i>Eremophila alpestris</i>      | <i>penicillata</i> | M   | 25-May-11 | 40.43 | 44.23  | KF735331 | KF735238, KF735239 | KF735571, KF735572 |
| IVF1100    | SDM               | <i>Eremophila alpestris</i>      | <i>penicillata</i> | F   | 16-Jun-11 | 40.42 | 44.25  | KF735332 | KF735240           | KF735573, KF735574 |
| SVD4632    | SDM               | <i>Eremophila alpestris</i>      | <i>penicillata</i> | M   | 25-May-11 | 40.43 | 44.23  | KF735486 | KF735241, KF735242 | KF735623, KF735624 |
| SVD4633    | SDM               | <i>Eremophila alpestris</i>      | <i>penicillata</i> | M   | 25-May-11 | 40.43 | 44.23  | KF735487 | KF735243, KF735244 | KF735625, KF735626 |
| EAK192     | MSUZM             | <i>Eremophila alpestris</i>      | <i>penicillata</i> | M   | 18-May-05 | 35.99 | 51.63  | KF735323 | KF735245, KF735246 | KF735543, KF735544 |
| EAK193     | MSUZM             | <i>Eremophila alpestris</i>      | <i>penicillata</i> | M   | 18-May-05 | 35.99 | 51.63  | KF735324 | KF735247, KF735248 | KF735545, KF735546 |
| EAK194     | MSUZM             | <i>Eremophila alpestris</i>      | <i>penicillata</i> | M   | 18-May-05 | 35.99 | 51.63  | KF735325 | KF735249, KF735250 | KF735547, KF735548 |
| EAK195     | MSUZM             | <i>Eremophila alpestris</i>      | <i>penicillata</i> | M   | 18-May-05 | 35.99 | 51.63  | KF735326 |                    | KF735549, KF735550 |
| EAK196     | MSUZM             | <i>Eremophila alpestris</i>      | <i>penicillata</i> | M   | 18-May-05 | 35.99 | 51.63  | KF735327 |                    | KF735551, KF735552 |
| GAV167     | UWBM 46543        | <i>Eremophila alpestris</i>      | <i>penicillata</i> | M   | 24-May-93 | 42.98 | 75.88  | KF735328 | KF735251, KF735252 | KF735555, KF735556 |
| GAV168     | UWBM 46544        | <i>Eremophila alpestris</i>      | <i>penicillata</i> | F   | 24-May-93 | 42.98 | 75.88  | KF735329 |                    |                    |
| GAV169     | UWBM 46545        | <i>Eremophila alpestris</i>      | <i>penicillata</i> | M   | 24-May-93 | 42.98 | 75.88  | KF735330 | KF735253, KF735254 | KF735557, KF735558 |
| F091       | MSUZM             | <i>Eremophila alpestris</i>      | <i>penicillata</i> | M   | 11-May-10 | 42.95 | 80.00  |          | KF735255, KF735256 | KF735553, KF735554 |
| IVYBN      | MSUZM             | <i>Eremophila alpestris</i>      | <i>penicillata</i> | M   | 11-May-10 | 42.95 | 80.00  | KF735333 | KF735257, KF735258 | KF735521, KF735522 |
| NHMUO18830 | NHMUO 18830       | <i>Eremophila alpestris</i>      | <i>flava</i>       | M   | 19-Jun-06 | 61.42 | 8.87   | KF735334 | KF735259, KF735260 | KF735513, KF735514 |
| ZMUC123699 | ZMUC 123699       | <i>Eremophila alpestris</i>      | <i>flava</i>       |     |           | 55.68 | 12.57  | KF735504 |                    |                    |
| NHMUO8534  | NHMUO 8534        | <i>Eremophila alpestris</i>      | <i>flava</i>       |     | 17-Jul-05 | 70.48 | 28.91  | KF735343 | KF735261, KF735262 |                    |
| NHMUO30995 | NHMUO 30995       | <i>Eremophila alpestris</i>      | <i>flava</i>       | M   | 24-Jun-10 | 70.39 | 31.01  | KF735340 | KF735263, KF735264 | KF735517, KF735518 |

Appendix S1. Samples used in this study and GenBank accession numbers

| ID            | Institution | Species                     | mtDNA clade    | Sex | Date      | Lat.  | Lon.   | ND2      | ACO1               | RHO                |
|---------------|-------------|-----------------------------|----------------|-----|-----------|-------|--------|----------|--------------------|--------------------|
| NHMUO8506     | NHMUO 8506  | <i>Eremophila alpestris</i> | <i>flava</i>   |     | 8-Jul-04  | 70.35 | 31.02  | KF735342 | KF735265           | KF735523, KF735524 |
| NHMUO31024    | NHMUO 31024 | <i>Eremophila alpestris</i> | <i>flava</i>   | M   | 27-Jun-10 | 70.34 | 31.03  | KF735341 | KF735266, KF735267 | KF735519, KF735520 |
| MVK139        | UWBM 74056  | <i>Eremophila alpestris</i> | <i>flava</i>   | F   | 18-May-01 | 59.83 | 52.72  | KF735460 | KF735268           | KF735587, KF735588 |
| MVK140        | UWBM 74057  | <i>Eremophila alpestris</i> | <i>flava</i>   | F   | 18-May-01 | 59.83 | 52.72  | KF735461 |                    |                    |
| MVK141        | UWBM 74058  | <i>Eremophila alpestris</i> | <i>flava</i>   | F   | 18-May-01 | 59.83 | 52.72  | KF735462 |                    |                    |
| SVD1431       | UWBM 59593  | <i>Eremophila alpestris</i> | <i>flava</i>   | M   | 12-Jun-97 | 68.02 | 68.60  | KF735470 |                    |                    |
| SVD1432       | UWBM 59594  | <i>Eremophila alpestris</i> | <i>flava</i>   | F   | 12-Jun-97 | 68.02 | 68.60  | KF735471 |                    |                    |
| SVD1433       | UWBM 59595  | <i>Eremophila alpestris</i> | <i>flava</i>   | F   | 12-Jun-97 | 68.02 | 68.60  | KF735472 |                    |                    |
| N85           | MSUZM       | <i>Eremophila alpestris</i> | <i>flava</i>   |     | 9-Aug-03  | 72.83 | 105.83 | KF735463 | KF735269           | KF735589, KF735590 |
| NAM173        | UWBM 66344  | <i>Eremophila alpestris</i> | <i>brandti</i> | M   | 19-Jun-00 | 50.38 | 89.87  | KF735468 |                    |                    |
| MSUZM1792000  | UWBM 75737  | <i>Eremophila alpestris</i> | <i>brandti</i> | M   | 5-Jun-00  | 50.15 | 90.14  | KF735451 |                    |                    |
| MSUZM1802000  | UWBM 75738  | <i>Eremophila alpestris</i> | <i>brandti</i> | M   | 5-Jun-00  | 50.15 | 90.14  | KF735452 |                    |                    |
| MSUZM1812000  | UWBM 75739  | <i>Eremophila alpestris</i> | <i>brandti</i> | M   | 5-Jun-00  | 50.15 | 90.14  | KF735453 |                    |                    |
| MSUZM1822000  | UWBM 75740  | <i>Eremophila alpestris</i> | <i>brandti</i> | M   | 5-Jun-00  | 50.15 | 90.14  | KF735454 |                    |                    |
| MSUZM2242000  | UWBM 75779  | <i>Eremophila alpestris</i> | <i>brandti</i> | M   | 8-Jun-00  | 50.15 | 90.14  | KF735455 |                    |                    |
| NAM161        | UWBM 66332  | <i>Eremophila alpestris</i> | <i>brandti</i> | F   | 17-Jun-00 | 50.35 | 90.48  | KF735466 |                    |                    |
| NAM162        | UWBM 66333  | <i>Eremophila alpestris</i> | <i>brandti</i> | M   | 17-Jun-00 | 50.35 | 90.48  | KF735467 |                    |                    |
| MSUZM1062000  | UWBM 75668  | <i>Eremophila alpestris</i> | <i>brandti</i> | M   | 27-May-00 | 50.62 | 91.52  | KF735448 |                    |                    |
| MSUZM1242000  | UWBM 75684  | <i>Eremophila alpestris</i> | <i>brandti</i> | M   | 31-May-00 | 50.28 | 90.66  | KF735449 |                    |                    |
| MSUZM1252000  | UWBM 75685  | <i>Eremophila alpestris</i> | <i>brandti</i> | M   | 31-May-00 | 50.28 | 90.66  | KF735450 |                    |                    |
| NAM140        | UWBM 66312  | <i>Eremophila alpestris</i> | <i>brandti</i> | M   | 13-Jun-00 | 50.65 | 91.60  | KF735464 |                    |                    |
| NAM142        | UWBM 66314  | <i>Eremophila alpestris</i> | <i>brandti</i> | F   | 13-Jun-00 | 50.65 | 91.60  | KF735465 |                    |                    |
| MSUZMn0601999 | UWBM 78960  | <i>Eremophila alpestris</i> | <i>brandti</i> | M   | 29-May-99 | 51.35 | 94.55  | KF735457 |                    |                    |
| MSUZMn0561999 | UWBM 67579  | <i>Eremophila alpestris</i> | <i>brandti</i> | F   | 28-May-99 | 51.42 | 94.77  | KF735456 |                    |                    |
| MSUZMp0511999 | UWBM 67679  | <i>Eremophila alpestris</i> | <i>brandti</i> | M   | 6-Jun-99  | 50.03 | 95.03  | KF735459 |                    |                    |
| RCF1976       | UWBM 66603  | <i>Eremophila alpestris</i> | <i>brandti</i> | M   | 9-Jul-00  | 50.07 | 95.13  | KF735469 |                    |                    |
| MSUZMn2381999 | UWBM 71026  | <i>Eremophila alpestris</i> | <i>brandti</i> | M   | 29-Jun-99 | 50.28 | 96.40  | KF735458 |                    |                    |
| DAB2299       | UWBM 58019  | <i>Eremophila alpestris</i> | <i>brandti</i> | M   | 11-Jun-97 | 48.12 | 100.37 | KF735366 |                    |                    |
| B10281        | USNM 586726 | <i>Eremophila alpestris</i> | <i>brandti</i> |     | 6-May-97  | 44.90 | 100.57 | KF735347 |                    |                    |
| BKS3990       | UWBM 57873  | <i>Eremophila alpestris</i> | <i>brandti</i> | M   | 5-Jun-97  | 44.90 | 100.57 | KF735353 |                    |                    |
| DAB2261       | UWBM 57984  | <i>Eremophila alpestris</i> | <i>brandti</i> | F   | 5-Jun-97  | 44.90 | 100.57 | KF735364 |                    |                    |
| DAB2262       | UWBM 57985  | <i>Eremophila alpestris</i> | <i>brandti</i> | F   | 5-Jun-97  | 44.90 | 100.57 | KF735365 |                    |                    |
| B10187        | USNM 586670 | <i>Eremophila alpestris</i> | <i>brandti</i> |     | 28-May-97 | 43.36 | 103.18 | KF735345 |                    |                    |
| B10275        | USNM 586720 | <i>Eremophila alpestris</i> | <i>brandti</i> |     | 28-May-97 | 43.36 | 103.18 | KF735346 |                    |                    |
| DAB2222       | UWBM 57949  | <i>Eremophila alpestris</i> | <i>brandti</i> | F   | 28-May-97 | 43.37 | 103.18 | KF735362 |                    |                    |
| DAB2234       | UWBM 57960  | <i>Eremophila alpestris</i> | <i>brandti</i> | M   | 29-May-97 | 43.37 | 103.18 | KF735363 |                    |                    |

Appendix S1. Samples used in this study and GenBank accession numbers

| ID      | Institution | Species                     | mtDNA clade      | Sex | Date      | Lat.  | Lon.   | ND2      | ACO1               | RHO                |
|---------|-------------|-----------------------------|------------------|-----|-----------|-------|--------|----------|--------------------|--------------------|
| LMC9745 | AMNH        | <i>Eremophila alpestris</i> | <i>brandti</i>   |     | 14-Jul-93 | 43.36 | 103.18 | KF735439 |                    |                    |
| B10177  | USNM 621499 | <i>Eremophila alpestris</i> | <i>brandti</i>   |     | 24-May-97 | 47.33 | 105.40 | KF735344 |                    |                    |
| CDS4894 | UWBM 46334  | <i>Eremophila alpestris</i> | <i>brandti</i>   | F   | 16-Jun-93 | 51.57 | 106.85 | KF735354 | KF735270           | KF735535, KF735536 |
| CDS4895 | UWBM 46335  | <i>Eremophila alpestris</i> | <i>brandti</i>   | M   | 16-Jun-93 | 51.57 | 106.85 | KF735355 | KF735271, KF735272 | KF735537, KF735538 |
| CDS4913 | UWBM 46353  | <i>Eremophila alpestris</i> | <i>brandti</i>   | M   | 18-Jun-93 | 51.57 | 106.85 | KF735356 |                    |                    |
| DAB2584 | UWBM 60021  | <i>Eremophila alpestris</i> | <i>brandti</i>   | F   | 9-May-98  | 47.77 | 112.15 | KF735367 |                    |                    |
| DAB2600 | UWBM 60037  | <i>Eremophila alpestris</i> | <i>brandti</i>   | F   | 11-May-98 | 48.03 | 114.38 | KF735368 |                    |                    |
| DAB2602 | UWBM 60039  | <i>Eremophila alpestris</i> | <i>brandti</i>   | F   | 11-May-98 | 48.03 | 114.38 | KF735369 |                    |                    |
| DAB2603 | UWBM 60040  | <i>Eremophila alpestris</i> | <i>brandti</i>   | F   | 12-May-98 | 48.03 | 114.38 | KF735370 |                    |                    |
| DAB2604 | UWBM 60041  | <i>Eremophila alpestris</i> | <i>brandti</i>   | M   | 12-May-98 | 48.03 | 114.38 | KF735371 |                    |                    |
| IUK2404 | USNM 640019 | <i>Eremophila alpestris</i> | <i>brandti</i>   | F   | 28-Jun-05 | 50.50 | 115.00 | KF735419 |                    |                    |
| IUK2405 | USNM 640020 | <i>Eremophila alpestris</i> | <i>brandti</i>   | M   | 28-Jun-05 | 50.50 | 115.00 | KF735420 |                    |                    |
| IUK2406 | USNM 640021 | <i>Eremophila alpestris</i> | <i>brandti</i>   | F   | 28-Jun-05 | 50.50 | 115.00 | KF735421 |                    |                    |
| IUK2413 | YPM         | <i>Eremophila alpestris</i> | <i>brandti</i>   | F   | 28-Jun-05 | 50.50 | 115.00 | KF735422 |                    |                    |
| IUK2414 | USNM 640028 | <i>Eremophila alpestris</i> | <i>brandti</i>   | M   | 28-Jun-05 | 50.50 | 115.00 | KF735423 |                    |                    |
| IUK2423 | YPM         | <i>Eremophila alpestris</i> | <i>brandti</i>   | M   | 30-Jun-05 | 50.50 | 115.00 | KF735424 |                    |                    |
| IUK2426 | USNM 640037 | <i>Eremophila alpestris</i> | <i>brandti</i>   | M   | 30-Jun-05 | 50.50 | 115.00 | KF735425 |                    |                    |
| IUK2427 | USNM 640038 | <i>Eremophila alpestris</i> | <i>brandti</i>   | M   | 30-Jun-05 | 50.50 | 115.00 | KF735426 |                    |                    |
| IVF0687 | SDM         | <i>Eremophila alpestris</i> | <i>brandti</i>   | F   | 30-Jun-05 | 50.50 | 115.00 | KF735427 |                    |                    |
| IVF0688 | SDM         | <i>Eremophila alpestris</i> | <i>brandti</i>   | M   | 30-Jun-05 | 50.50 | 115.00 | KF735428 |                    |                    |
| SVD3556 | USNM 640648 | <i>Eremophila alpestris</i> | <i>brandti</i>   | M   | 28-Jun-05 | 50.50 | 115.00 | KF735480 | KF735273, KF735274 |                    |
| SVD3568 | USNM 640660 | <i>Eremophila alpestris</i> | <i>brandti</i>   | F   | 30-Jun-05 | 50.50 | 115.00 | KF735481 | KF735275           | KF735613, KF735614 |
| SVD3569 | USNM 640661 | <i>Eremophila alpestris</i> | <i>brandti</i>   | M   | 30-Jun-05 | 50.50 | 115.00 | KF735482 | KF735276, KF735277 | KF735615, KF735616 |
| SVD3570 | USNM 640662 | <i>Eremophila alpestris</i> | <i>brandti</i>   | M   | 30-Jun-05 | 50.50 | 115.00 | KF735483 | KF735278, KF735279 | KF735617, KF735618 |
| CSW5801 | UWBM 59834  | <i>Eremophila alpestris</i> | <i>brandti</i>   | F   | 15-May-98 | 48.43 | 115.10 | KF735357 |                    |                    |
| CSW5803 | UWBM 59836  | <i>Eremophila alpestris</i> | <i>brandti</i>   | M   | 15-May-98 | 48.43 | 115.10 | KF735358 |                    |                    |
| SVD2365 | UWBM 66901  | <i>Eremophila alpestris</i> | <i>alpestris</i> | M   | 2-Jun-00  | 65.73 | 194.14 | DQ187408 |                    |                    |
| SVD2366 | UWBM 66902  | <i>Eremophila alpestris</i> | <i>alpestris</i> | M   | 2-Jun-00  | 65.66 | 193.82 | DQ187409 |                    |                    |
| SVD2367 | UWBM 66903  | <i>Eremophila alpestris</i> | <i>alpestris</i> | M   | 3-Jun-00  | 65.97 | 193.82 | DQ187410 |                    |                    |
| SVD2368 | UWBM 66904  | <i>Eremophila alpestris</i> | <i>alpestris</i> | F   | 3-Jun-00  | 65.97 | 193.82 | DQ187411 |                    |                    |
| SVD2369 | UWBM 66905  | <i>Eremophila alpestris</i> | <i>alpestris</i> | M   | 6-Jun-00  | 65.43 | 195.23 | DQ187412 |                    |                    |
| UAMX014 | UAM 7608    | <i>Eremophila alpestris</i> | <i>alpestris</i> | F   | 24-May-97 | 64.84 | 212.28 | DQ187390 |                    |                    |
| B13413  | USNM 622679 | <i>Eremophila alpestris</i> | <i>alpestris</i> |     | 22-Aug-00 | 64.58 | 213.25 | DQ187391 |                    |                    |
| B13421  | USNM 622678 | <i>Eremophila alpestris</i> | <i>alpestris</i> |     | 22-Aug-00 | 64.58 | 213.25 | DQ187392 |                    |                    |
| B13422  | USNM 622677 | <i>Eremophila alpestris</i> | <i>alpestris</i> |     | 22-Aug-00 | 64.58 | 213.25 | DQ187393 |                    |                    |
| B13492  | USNM 601741 | <i>Eremophila alpestris</i> | <i>alpestris</i> |     | 22-Aug-00 | 64.58 | 213.25 | DQ187397 |                    |                    |

Appendix S1. Samples used in this study and GenBank accession numbers

| ID       | Institution | Species                     | mtDNA clade      | Sex              | Date      | Lat.  | Lon.   | ND2      | ACO1               | RHO                |
|----------|-------------|-----------------------------|------------------|------------------|-----------|-------|--------|----------|--------------------|--------------------|
| B13493   | USNM 601742 | <i>Eremophila alpestris</i> | <i>alpestris</i> |                  | 22-Aug-00 | 64.58 | 213.25 | DQ187398 |                    |                    |
| B13425   | USNM 622682 | <i>Eremophila alpestris</i> | <i>alpestris</i> |                  | 22-Aug-00 | 64.63 | 213.39 | DQ187394 |                    |                    |
| B13426   | USNM 622681 | <i>Eremophila alpestris</i> | <i>alpestris</i> |                  | 22-Aug-00 | 64.63 | 213.39 | DQ187395 |                    |                    |
| B13485   | USNM 601740 | <i>Eremophila alpestris</i> | <i>alpestris</i> |                  | 22-Aug-00 | 64.64 | 213.40 | DQ187396 |                    |                    |
| KSW1478  | UAM 7752    | <i>Eremophila alpestris</i> | <i>alpestris</i> | F                | 24-Jun-97 | 65.48 | 214.60 | DQ187399 |                    |                    |
| KSW1479  | UAM 7617    | <i>Eremophila alpestris</i> | <i>alpestris</i> | M                | 24-Jun-97 | 65.48 | 214.60 | DQ187400 |                    |                    |
| KSW1485  | UAM 8957    | <i>Eremophila alpestris</i> | <i>alpestris</i> | F                | 24-Jun-97 | 65.48 | 214.60 | DQ187401 |                    |                    |
| KSW1500  | UAM 7607    | <i>Eremophila alpestris</i> | <i>alpestris</i> | F                | 25-Jun-97 | 65.48 | 214.60 | DQ187402 |                    |                    |
| UAMX775  | UAM 10087   | <i>Eremophila alpestris</i> | <i>alpestris</i> | M                | 25-Jun-97 | 65.48 | 214.60 | DQ187403 |                    |                    |
| UAMX790  | UAM 10088   | <i>Eremophila alpestris</i> | <i>alpestris</i> | M                | 25-Jun-97 | 65.48 | 214.60 | DQ187404 |                    |                    |
| DAB0686  | UWBM 53941  | <i>Eremophila alpestris</i> | <i>alpestris</i> | M                | 22-Jun-95 | 65.50 | 214.62 | DQ187405 |                    |                    |
| DAB0688  | UWBM 53943  | <i>Eremophila alpestris</i> | <i>alpestris</i> | F                | 22-Jun-95 | 65.50 | 214.62 | DQ187406 |                    |                    |
| DAB0689  | UWBM 53944  | <i>Eremophila alpestris</i> | <i>alpestris</i> | F                | 22-Jun-95 | 65.50 | 214.62 | DQ187407 |                    |                    |
| SVD3377  | USNM 640482 | <i>Eremophila alpestris</i> | <i>alpestris</i> | F                | 31-Jul-04 | 63.06 | 214.24 |          |                    | KF735611, KF735612 |
| SVD4092  | YPM         | <i>Eremophila alpestris</i> | <i>alpestris</i> | M                | 6-Jul-07  | 64.59 | 218.73 | KF735484 | KF735280, KF735281 | KF735619, KF735620 |
| SVD4093  | YPM         | <i>Eremophila alpestris</i> | <i>alpestris</i> | M                | 6-Jul-07  | 64.59 | 218.73 | KF735485 | KF735282, KF735283 | KF735621, KF735622 |
| UBC28334 | UBC28334    | <i>Eremophila alpestris</i> | <i>alpestris</i> | nestling feather |           | 54.78 | 232.72 | KF735491 |                    |                    |
| UBC29857 | UBC29857    | <i>Eremophila alpestris</i> | <i>alpestris</i> | nestling feather |           | 54.78 | 232.72 | KF735492 |                    |                    |
| UBC29858 | UBC29858    | <i>Eremophila alpestris</i> | <i>alpestris</i> | nestling feather |           | 54.78 | 232.72 | KF735493 |                    |                    |
| UBC29860 | UBC29860    | <i>Eremophila alpestris</i> | <i>alpestris</i> | nestling feather |           | 54.78 | 232.72 | KF735494 |                    |                    |
| UBC29861 | UBC29861    | <i>Eremophila alpestris</i> | <i>alpestris</i> | nestling feather |           | 54.78 | 232.72 | KF735495 |                    |                    |
| UBC36201 | UBC36201    | <i>Eremophila alpestris</i> | <i>alpestris</i> | nestling feather |           | 54.78 | 232.72 | KF735496 |                    |                    |
| UBC36202 | UBC36202    | <i>Eremophila alpestris</i> | <i>alpestris</i> | nestling feather |           | 54.78 | 232.72 | KF735497 |                    |                    |
| UBC36206 | UBC36206    | <i>Eremophila alpestris</i> | <i>alpestris</i> | nestling feather |           | 54.78 | 232.72 | KF735498 |                    |                    |
| UBC36209 | UBC36209    | <i>Eremophila alpestris</i> | <i>alpestris</i> | nestling feather |           | 54.78 | 232.72 | KF735499 |                    |                    |
| UBC36218 | UBC36218    | <i>Eremophila alpestris</i> | <i>alpestris</i> | nestling feather |           | 54.78 | 232.72 | KF735500 |                    |                    |
| UBC36242 | UBC36242    | <i>Eremophila alpestris</i> | <i>alpestris</i> | nestling feather |           | 54.78 | 232.72 | KF735501 | KF735284           | KF735627, KF735628 |
| SMB413   | UWBM        | <i>Eremophila alpestris</i> | <i>alpestris</i> |                  |           | 46.80 | 235.90 | DQ187457 | KF735285           | KF735599, KF735600 |
| SMB414   | UWBM        | <i>Eremophila alpestris</i> | <i>alpestris</i> |                  |           | 46.80 | 235.90 | DQ187458 |                    |                    |
| SMB415   | UWBM        | <i>Eremophila alpestris</i> | <i>alpestris</i> |                  |           | 46.80 | 235.90 | DQ187459 |                    |                    |
| SMB416   | UWBM        | <i>Eremophila alpestris</i> | <i>alpestris</i> |                  |           | 46.80 | 235.90 | DQ187460 |                    |                    |
| SMB417   | UWBM        | <i>Eremophila alpestris</i> | <i>alpestris</i> |                  |           | 46.80 | 235.90 | DQ187462 |                    |                    |
| SMB418   | UWBM        | <i>Eremophila alpestris</i> | <i>alpestris</i> |                  |           | 46.10 | 236.70 | DQ187463 |                    |                    |
| SMB419   | UWBM        | <i>Eremophila alpestris</i> | <i>alpestris</i> |                  |           | 46.10 | 236.70 | DQ187464 |                    |                    |
| SMB420   | UWBM        | <i>Eremophila alpestris</i> | <i>alpestris</i> |                  |           | 46.10 | 236.70 | DQ187465 |                    |                    |
| SMB421   | UWBM        | <i>Eremophila alpestris</i> | <i>alpestris</i> |                  |           | 46.10 | 236.70 | DQ187466 |                    |                    |

Appendix S1. Samples used in this study and GenBank accession numbers

| ID      | Institution | Species                     | mtDNA clade      | Sex | Date      | Lat.  | Lon.   | ND2      | ACO1               | RHO                |
|---------|-------------|-----------------------------|------------------|-----|-----------|-------|--------|----------|--------------------|--------------------|
| SMB422  | UWBM        | <i>Eremophila alpestris</i> | <i>alpestris</i> |     |           | 46.10 | 236.70 | DQ187467 |                    |                    |
| JMB758  | UWBM 46848  | <i>Eremophila alpestris</i> | <i>alpestris</i> | F   | 11-Aug-91 | 40.18 | 237.77 | KF735438 |                    |                    |
| RCF2596 | UWBM        | <i>Eremophila alpestris</i> | <i>alpestris</i> |     |           | 47.10 | 237.40 | DQ187461 |                    |                    |
| SMB397  | UWBM        | <i>Eremophila alpestris</i> | <i>alpestris</i> |     |           | 47.10 | 237.40 | DQ187444 |                    |                    |
| SMB398  | UWBM        | <i>Eremophila alpestris</i> | <i>alpestris</i> |     |           | 47.10 | 237.40 | DQ187445 |                    |                    |
| SMB401  | UWBM        | <i>Eremophila alpestris</i> | <i>alpestris</i> |     |           | 47.10 | 237.40 | DQ187446 |                    |                    |
| SMB402  | UWBM        | <i>Eremophila alpestris</i> | <i>alpestris</i> |     |           | 47.10 | 237.40 | DQ187447 |                    |                    |
| SMB403  | UWBM        | <i>Eremophila alpestris</i> | <i>alpestris</i> |     |           | 47.10 | 237.40 | DQ187448 |                    |                    |
| SMB404  | UWBM        | <i>Eremophila alpestris</i> | <i>alpestris</i> |     |           | 47.10 | 237.40 | DQ187449 |                    |                    |
| SMB405  | UWBM        | <i>Eremophila alpestris</i> | <i>alpestris</i> |     |           | 47.10 | 237.40 | DQ187450 |                    |                    |
| SMB406  | UWBM        | <i>Eremophila alpestris</i> | <i>alpestris</i> |     |           | 47.10 | 237.40 | DQ187451 |                    |                    |
| SMB407  | UWBM        | <i>Eremophila alpestris</i> | <i>alpestris</i> |     |           | 47.10 | 237.40 | DQ187452 |                    |                    |
| SMB408  | UWBM        | <i>Eremophila alpestris</i> | <i>alpestris</i> |     |           | 47.10 | 237.40 | DQ187453 |                    |                    |
| SMB410  | UWBM        | <i>Eremophila alpestris</i> | <i>alpestris</i> |     |           | 47.10 | 237.40 | DQ187454 |                    |                    |
| SMB411  | UWBM        | <i>Eremophila alpestris</i> | <i>alpestris</i> |     |           | 47.10 | 237.40 | DQ187455 |                    |                    |
| SMB412  | UWBM        | <i>Eremophila alpestris</i> | <i>alpestris</i> |     |           | 47.10 | 237.40 | DQ187456 |                    |                    |
| EVL481  | UWBM 77057  | <i>Eremophila alpestris</i> | <i>alpestris</i> |     | 21-May-02 | 47.09 | 237.42 | DQ187437 |                    |                    |
| EVL483  | UWBM 77059  | <i>Eremophila alpestris</i> | <i>alpestris</i> |     | 2-Jul-02  | 47.09 | 237.42 | DQ187439 |                    |                    |
| EVL484  | UWBM 77060  | <i>Eremophila alpestris</i> | <i>alpestris</i> |     | 2-Jul-02  | 47.09 | 237.42 | DQ187440 |                    |                    |
| GKD375  | UWBM 77062  | <i>Eremophila alpestris</i> | <i>alpestris</i> |     | 3-Jul-02  | 47.09 | 237.42 | DQ187441 |                    |                    |
| GKD377  | UWBM 77064  | <i>Eremophila alpestris</i> | <i>alpestris</i> |     | 17-Jul-02 | 47.09 | 237.42 | DQ187443 |                    |                    |
| EVL482  | UWBM 77058  | <i>Eremophila alpestris</i> | <i>alpestris</i> |     | 16-Jul-02 | 46.97 | 237.51 | DQ187438 |                    |                    |
| GKD376  | UWBM 77063  | <i>Eremophila alpestris</i> | <i>alpestris</i> |     | 25-Jun-02 | 46.97 | 237.51 | DQ187442 |                    |                    |
| EVL485  | UWBM 77061  | <i>Eremophila alpestris</i> | <i>alpestris</i> | F   | 9-May-02  | 47.14 | 237.52 | KF735395 |                    |                    |
| SVD0999 | UWBM 53445  | <i>Eremophila alpestris</i> | <i>alpestris</i> | M   | 19-Jul-95 | 48.77 | 238.08 | DQ187484 | KF735286, KF735287 | KF735601, KF735602 |
| SVD1000 | UWBM 53410  | <i>Eremophila alpestris</i> | <i>alpestris</i> | F   | 19-Jul-95 | 48.77 | 238.08 | DQ187485 |                    |                    |
| SVD1001 | UWBM 53411  | <i>Eremophila alpestris</i> | <i>alpestris</i> | M   | 19-Jul-95 | 48.77 | 238.08 | DQ187486 |                    |                    |
| NKJ5923 | MVZ 171608  | <i>Eremophila alpestris</i> | <i>alpestris</i> |     | 30-Mar-88 | 37.63 | 238.53 | DQ187413 |                    |                    |
| NKJ5924 | MVZ 171609  | <i>Eremophila alpestris</i> | <i>alpestris</i> |     | 30-Mar-88 | 37.63 | 238.53 | DQ187414 |                    |                    |
| NKJ5925 | MVZ 171610  | <i>Eremophila alpestris</i> | <i>alpestris</i> | M   | 30-Mar-88 | 37.63 | 238.53 | DQ187415 | KF735288, KF735289 |                    |
| NKJ5926 | MVZ 171611  | <i>Eremophila alpestris</i> | <i>alpestris</i> | M   | 30-Mar-88 | 37.63 | 238.53 | DQ187416 | KF735290, KF735291 | KF735591, KF735592 |
| NKJ5927 | MVZ 171612  | <i>Eremophila alpestris</i> | <i>alpestris</i> |     | 30-Mar-88 | 37.63 | 238.53 | DQ187417 |                    |                    |
| NKJ5928 | MVZ 171613  | <i>Eremophila alpestris</i> | <i>alpestris</i> |     | 30-Mar-88 | 37.63 | 238.53 | DQ187418 | KF735292, KF735293 |                    |
| NKJ5929 | MVZ 171614  | <i>Eremophila alpestris</i> | <i>alpestris</i> |     | 30-Mar-88 | 37.63 | 238.53 | DQ187419 |                    |                    |
| NKJ5930 | MVZ 171615  | <i>Eremophila alpestris</i> | <i>alpestris</i> | F   | 30-Mar-88 | 37.63 | 238.53 | DQ187420 | KF735294           | KF735593, KF735594 |
| NKJ5931 | MVZ 171616  | <i>Eremophila alpestris</i> | <i>alpestris</i> |     | 30-Mar-88 | 37.63 | 238.53 | DQ187421 |                    |                    |

Appendix S1. Samples used in this study and GenBank accession numbers

| ID       | Institution | Species                     | mtDNA clade      | Sex | Date      | Lat.  | Lon.   | ND2      | ACO1               | RHO                |
|----------|-------------|-----------------------------|------------------|-----|-----------|-------|--------|----------|--------------------|--------------------|
| NKJ5932  | MVZ 171617  | <i>Eremophila alpestris</i> | <i>alpestris</i> |     | 30-Mar-88 | 37.63 | 238.53 | DQ187422 |                    |                    |
| NKJ5933  | MVZ 171618  | <i>Eremophila alpestris</i> | <i>alpestris</i> |     | 30-Mar-88 | 37.63 | 238.53 | DQ187423 |                    |                    |
| NKJ6003  | MVZ 171619  | <i>Eremophila alpestris</i> | <i>alpestris</i> |     | 16-May-88 | 37.63 | 238.53 | DQ187424 |                    |                    |
| NKJ6004  | MVZ 171620  | <i>Eremophila alpestris</i> | <i>alpestris</i> |     | 16-May-88 | 37.63 | 238.53 | DQ187425 |                    |                    |
| NKJ6005  | MVZ 171621  | <i>Eremophila alpestris</i> | <i>alpestris</i> |     | 16-May-88 | 37.63 | 238.53 | DQ187426 |                    |                    |
| NKJ6006  | MVZ 171622  | <i>Eremophila alpestris</i> | <i>alpestris</i> |     | 16-May-88 | 37.63 | 238.53 | DQ187427 |                    |                    |
| NKJ6007  | MVZ 171623  | <i>Eremophila alpestris</i> | <i>alpestris</i> |     | 16-May-88 | 37.63 | 238.53 | DQ187428 |                    |                    |
| NKJ6008  | MVZ 171624  | <i>Eremophila alpestris</i> | <i>alpestris</i> |     | 16-May-88 | 37.63 | 238.53 | DQ187429 |                    |                    |
| NKJ6009  | MVZ 171625  | <i>Eremophila alpestris</i> | <i>alpestris</i> |     | 16-May-88 | 37.63 | 238.53 | DQ187430 |                    |                    |
| NKJ6010  | MVZ 171626  | <i>Eremophila alpestris</i> | <i>alpestris</i> | F   | 16-May-88 | 37.63 | 238.53 | DQ187431 | KF735295           | KF735595, KF735596 |
| SVD2356  | UWBM 66190  | <i>Eremophila alpestris</i> | <i>alpestris</i> | M   | 16-Jun-00 | 42.48 | 239.72 | DQ187432 | KF735296, KF735297 | KF735603, KF735604 |
| SVD2357  | UWBM 66191  | <i>Eremophila alpestris</i> | <i>alpestris</i> | M   | 16-Jun-00 | 42.48 | 239.72 | DQ187433 |                    |                    |
| SVD2358  | UWBM 66194  | <i>Eremophila alpestris</i> | <i>alpestris</i> | M   | 16-Jun-00 | 42.48 | 239.72 | DQ187434 |                    |                    |
| SVD2359  | UWBM 66192  | <i>Eremophila alpestris</i> | <i>alpestris</i> | M   | 16-Jun-00 | 42.48 | 239.72 | DQ187435 |                    |                    |
| SVD2360  | UWBM 66193  | <i>Eremophila alpestris</i> | <i>alpestris</i> | M   | 16-Jun-00 | 42.48 | 239.72 | DQ187436 |                    |                    |
| SVD2207  | UWBM 64947  | <i>Eremophila alpestris</i> | <i>alpestris</i> | M   | 28-Apr-00 | 47.02 | 239.98 | DQ187483 |                    |                    |
| SAR7267  | UWBM 58576  | <i>Eremophila alpestris</i> | <i>alpestris</i> | F   | 19-Jul-97 | 48.67 | 240.07 | DQ187487 |                    |                    |
| DAB0411  | UWBM 51057  | <i>Eremophila alpestris</i> | <i>alpestris</i> | M   | 12-Mar-94 | 47.81 | 240.36 | DQ187477 |                    |                    |
| CSW6422  | UWBM 74049  | <i>Eremophila alpestris</i> | <i>alpestris</i> | M   | 25-Apr-03 | 47.05 | 240.48 | DQ187475 |                    |                    |
| CSW6423  | UWBM 74050  | <i>Eremophila alpestris</i> | <i>alpestris</i> | M   | 25-Apr-03 | 47.05 | 240.48 | DQ187476 |                    |                    |
| CSW5717  | UWBM 58529  | <i>Eremophila alpestris</i> | <i>alpestris</i> | M   | 18-Jul-97 | 48.68 | 240.49 | DQ187473 |                    |                    |
| CSW5718  | UWBM 58530  | <i>Eremophila alpestris</i> | <i>alpestris</i> |     | 18-Jul-97 | 48.68 | 240.49 | DQ187474 |                    |                    |
| PLG216   | UWBM 58564  | <i>Eremophila alpestris</i> | <i>alpestris</i> | M   | 18-Jul-97 | 48.68 | 240.49 | DQ187478 | KF735298, KF735299 | KF735597, KF735598 |
| SVD2197  | UWBM 64941  | <i>Eremophila alpestris</i> | <i>alpestris</i> | M   | 15-Apr-00 | 47.00 | 240.57 | DQ187479 |                    |                    |
| SVD2198  | UWBM 64942  | <i>Eremophila alpestris</i> | <i>alpestris</i> | M   | 15-Apr-00 | 47.00 | 240.57 | DQ187480 |                    |                    |
| SVD2199  | UWBM 64943  | <i>Eremophila alpestris</i> | <i>alpestris</i> | M   | 15-Apr-00 | 47.00 | 240.57 | DQ187481 |                    |                    |
| SVD2200  | UWBM 64944  | <i>Eremophila alpestris</i> | <i>alpestris</i> | F   | 15-Apr-00 | 47.00 | 240.57 | DQ187482 |                    |                    |
| CSW5140a | UWBM 52515  | <i>Eremophila alpestris</i> | <i>alpestris</i> | F   | 18-Apr-95 | 47.61 | 240.71 | DQ187471 |                    |                    |
| CSW5141a | UWBM 52516  | <i>Eremophila alpestris</i> | <i>alpestris</i> | M   | 18-Apr-95 | 47.61 | 240.71 | DQ187472 |                    |                    |
| BKS1405  | UWBM 69686  | <i>Eremophila alpestris</i> | <i>alpestris</i> | F   | 12-Mar-94 | 46.93 | 240.82 | DQ187468 |                    |                    |
| BKS1417  | UWBM 69698  | <i>Eremophila alpestris</i> | <i>alpestris</i> | M   | 11-Mar-94 | 46.93 | 240.82 | DQ187469 |                    |                    |
| BKS1419  | UWBM 69700  | <i>Eremophila alpestris</i> | <i>alpestris</i> | M   | 13-Mar-94 | 46.93 | 240.82 | DQ187470 |                    |                    |
| JK00336  | MBM 8470    | <i>Eremophila alpestris</i> | <i>alpestris</i> |     | 21-Jun-00 | 37.28 | 243.47 | KF735431 |                    |                    |
| DHB3640  | MBM 8472    | <i>Eremophila alpestris</i> | <i>alpestris</i> |     | 21-Jul-00 | 37.18 | 243.90 | KF735378 |                    |                    |
| DHB3642  | MBM 8474    | <i>Eremophila alpestris</i> | <i>alpestris</i> |     | 8-Jun-00  | 37.18 | 243.90 | KF735379 |                    |                    |
| DHB3643  | MBM 8473    | <i>Eremophila alpestris</i> | <i>alpestris</i> |     | 8-Jun-00  | 37.18 | 243.90 | KF735380 |                    |                    |

Appendix S1. Samples used in this study and GenBank accession numbers

| ID      | Institution | Species                     | mtDNA clade      | Sex | Date      | Lat.  | Lon.   | ND2      | ACO1               | RHO                |
|---------|-------------|-----------------------------|------------------|-----|-----------|-------|--------|----------|--------------------|--------------------|
| DHB3644 | MBM 8471    | <i>Eremophila alpestris</i> | <i>alpestris</i> |     | 8-Jun-00  | 37.18 | 243.90 | KF735381 |                    |                    |
| DHB3646 | MBM 8478    | <i>Eremophila alpestris</i> | <i>alpestris</i> |     | 8-Jun-00  | 37.18 | 243.90 | KF735382 |                    |                    |
| DHB3647 | MBM 8477    | <i>Eremophila alpestris</i> | <i>alpestris</i> |     | 8-Jun-00  | 37.18 | 243.90 | KF735383 |                    |                    |
| DHB3648 | MBM 8481    | <i>Eremophila alpestris</i> | <i>alpestris</i> |     | 8-Jun-00  | 37.18 | 243.90 | KF735384 |                    |                    |
| DHB3649 | MBM 8479    | <i>Eremophila alpestris</i> | <i>alpestris</i> |     | 8-Jun-00  | 37.08 | 243.90 | KF735385 |                    |                    |
| DHB3650 | MBM 8480    | <i>Eremophila alpestris</i> | <i>alpestris</i> |     | 8-Jun-00  | 37.08 | 243.90 | KF735386 |                    |                    |
| DHB3982 | MBM 9771    | <i>Eremophila alpestris</i> | <i>alpestris</i> |     | 22-May-01 | 37.18 | 243.92 | KF735387 |                    |                    |
| DHB3992 | MBM 9772    | <i>Eremophila alpestris</i> | <i>alpestris</i> |     | 22-May-01 | 37.18 | 243.92 | KF735388 |                    |                    |
| DHB4005 | MBM 9773    | <i>Eremophila alpestris</i> | <i>alpestris</i> |     | 22-May-01 | 37.18 | 243.92 | KF735389 |                    |                    |
| JK00346 | MBM 8504    | <i>Eremophila alpestris</i> | <i>alpestris</i> |     | 7-Jun-00  | 37.18 | 243.93 | KF735432 |                    |                    |
| JK00348 | MBM 8505    | <i>Eremophila alpestris</i> | <i>alpestris</i> |     | 7-Jun-00  | 37.18 | 243.93 | KF735433 |                    |                    |
| GAV1938 | MBM 8546    | <i>Eremophila alpestris</i> | <i>alpestris</i> |     | 12-Jul-00 | 37.12 | 243.95 | KF735399 |                    |                    |
| GAV1939 | MBM 8547    | <i>Eremophila alpestris</i> | <i>alpestris</i> |     | 12-Jul-00 | 37.12 | 243.95 | KF735400 |                    | KF735561, KF735562 |
| GAV1940 | MBM 8548    | <i>Eremophila alpestris</i> | <i>alpestris</i> |     | 12-Jul-00 | 37.12 | 243.95 | KF735401 |                    |                    |
| JK00354 | MBM 8503    | <i>Eremophila alpestris</i> | <i>alpestris</i> |     | 12-Jun-00 | 37.12 | 243.95 | KF735434 |                    |                    |
| GAV1937 | MBM 8545    | <i>Eremophila alpestris</i> | <i>alpestris</i> |     | 7-Jun-00  | 37.12 | 244.00 | KF735398 |                    |                    |
| B24753  | LSUMNS      | <i>Eremophila alpestris</i> | <i>alpestris</i> |     | 7-May-96  | 33.13 | 244.49 | KF735349 |                    |                    |
| DHB2538 | MBM 5676    | <i>Eremophila alpestris</i> | <i>alpestris</i> | M   | 11-Jul-98 | 37.68 | 246.94 | KF735377 | KF735300, KF735301 | KF735541, KF735542 |
| JDW0038 | BMUM 43727  | <i>Eremophila alpestris</i> | <i>alpestris</i> |     | 18-Jun-94 | 46.60 | 247.05 | KF735429 |                    |                    |
| B7308   | USNM        | <i>Eremophila alpestris</i> | <i>alpestris</i> |     |           | 33.53 | 247.63 | KF735352 |                    |                    |
| X7327   | BMUM 43726  | <i>Eremophila alpestris</i> | <i>alpestris</i> | M   | 19-Jun-94 | 48.51 | 249.03 | KF735502 |                    |                    |
| JK9477  | BMUM 43724  | <i>Eremophila alpestris</i> | <i>alpestris</i> | M   | 20-Jun-94 | 48.57 | 249.70 | KF735435 |                    |                    |
| JK9478  | BMUM 43730  | <i>Eremophila alpestris</i> | <i>alpestris</i> | M   | 20-Jun-94 | 48.57 | 249.70 | KF735436 |                    |                    |
| JK9479  | BMUM 43728  | <i>Eremophila alpestris</i> | <i>alpestris</i> | F   | 20-Jun-94 | 48.57 | 249.70 | KF735437 |                    |                    |
| X7328   | BMUM 43725  | <i>Eremophila alpestris</i> | <i>alpestris</i> | M   | 20-Jun-94 | 48.65 | 249.90 | KF735503 |                    |                    |
| GAV0861 | UWBM 56362  | <i>Eremophila alpestris</i> | <i>alpestris</i> | M   | 24-Jun-96 | 38.69 | 253.52 | KF735403 | KF735302, KF735303 | KF735559, KF735560 |
| DHB1994 | UWBM 70312  | <i>Eremophila alpestris</i> | <i>alpestris</i> | F   | 21-Jun-96 | 39.60 | 254.29 | KF735372 |                    |                    |
| DHB1995 | UWBM 70313  | <i>Eremophila alpestris</i> | <i>alpestris</i> | M   | 21-Jun-96 | 39.60 | 254.29 | KF735373 |                    |                    |
| GAV0849 | UWBM 56350  | <i>Eremophila alpestris</i> | <i>alpestris</i> | F   | 22-Jun-96 | 39.79 | 254.23 | KF735402 |                    |                    |
| CSW6291 | UWBM 72563  | <i>Eremophila alpestris</i> | <i>alpestris</i> | M   | 9-Jun-01  | 40.58 | 255.27 | KF735359 |                    | KF735539, KF735540 |
| CSW6292 | UWBM 72564  | <i>Eremophila alpestris</i> | <i>alpestris</i> | M   | 6-Jul-00  | 40.58 | 255.27 | KF735360 |                    |                    |
| CSW6293 | UWBM 72565  | <i>Eremophila alpestris</i> | <i>alpestris</i> | M   | 22-Jun-00 | 40.58 | 255.27 | KF735361 |                    |                    |
| EVL371  | UWBM 72567  | <i>Eremophila alpestris</i> | <i>alpestris</i> | M   | 20-May-00 | 40.58 | 255.27 | KF735390 |                    |                    |
| EVL372  | UWBM 72568  | <i>Eremophila alpestris</i> | <i>alpestris</i> | M   | 5-Jun-01  | 40.58 | 255.27 | KF735391 |                    |                    |
| EVL373  | UWBM 72569  | <i>Eremophila alpestris</i> | <i>alpestris</i> |     | 9-Jul-01  | 40.70 | 255.22 | KF735392 |                    |                    |
| EVL388  | UWBM 72570  | <i>Eremophila alpestris</i> | <i>alpestris</i> | M   | 18-May-01 | 40.58 | 255.27 | KF735393 |                    |                    |

Appendix S1. Samples used in this study and GenBank accession numbers

| ID      | Institution | Species                     | mtDNA clade      | Sex       | Date      | Lat.  | Lon.   | ND2      | ACO1     | RHO                |
|---------|-------------|-----------------------------|------------------|-----------|-----------|-------|--------|----------|----------|--------------------|
| EVL389  | UWBM 72571  | <i>Eremophila alpestris</i> | <i>alpestris</i> | F         | 24-Jun-00 | 40.58 | 255.27 | KF735394 |          |                    |
| GKD200  | UWBM 72572  | <i>Eremophila alpestris</i> | <i>alpestris</i> | F         | 5-Jun-00  | 40.58 | 255.27 | KF735404 | KF735304 | KF735563, KF735564 |
| GKD201  | UWBM 72573  | <i>Eremophila alpestris</i> | <i>alpestris</i> | F         | 27-May-01 | 40.58 | 255.27 | KF735405 | KF735305 | KF735565, KF735566 |
| MLD042  | UWBM 72574  | <i>Eremophila alpestris</i> | <i>alpestris</i> | M         | 24-Jun-00 | 40.58 | 255.27 | KF735440 |          |                    |
| MLD043  | UWBM 72575  | <i>Eremophila alpestris</i> | <i>alpestris</i> | M         | 20-May-00 | 40.58 | 255.27 | KF735441 |          |                    |
| EVL766  | UWBM 80629  | <i>Eremophila alpestris</i> | <i>alpestris</i> | M         | 7-Jun-04  | 46.85 | 256.03 | KF735396 |          |                    |
| EVL769  | UWBM 80632  | <i>Eremophila alpestris</i> | <i>alpestris</i> | M         | 7-Jun-04  | 46.85 | 256.03 | KF735397 |          |                    |
| DHB2279 | MBM 5161    | <i>Eremophila alpestris</i> | <i>alpestris</i> | F         | 20-Jun-97 | 38.21 | 256.44 | KF735374 |          |                    |
| DHB2281 | MBM 5155    | <i>Eremophila alpestris</i> | <i>alpestris</i> | F         | 20-Jun-97 | 38.21 | 256.44 | KF735375 |          |                    |
| DHB2283 | MBM 5154    | <i>Eremophila alpestris</i> | <i>alpestris</i> | F         | 20-Jun-97 | 38.21 | 256.44 | KF735376 |          |                    |
| T208    | UMMZ        | <i>Eremophila alpestris</i> | <i>alpestris</i> |           | 27-Jun-87 | 36.75 | 257.48 | KF735490 |          |                    |
| T1777   | UMIMNH      | <i>Eremophila alpestris</i> | <i>alpestris</i> |           | 16-May-93 | 41.63 | 257.68 | KF735489 |          |                    |
| B2273   | KUNHM       | <i>Eremophila alpestris</i> | <i>alpestris</i> |           | 28-Jun-00 | 38.17 | 263.59 | KF735348 |          |                    |
| JDW0097 | BMUM 42513  | <i>Eremophila alpestris</i> | <i>alpestris</i> | M         | 7-Mar-95  | 45.00 | 264.09 | KF735430 |          |                    |
| b3558   | KUNHM       | <i>Eremophila alpestris</i> | <i>alpestris</i> |           | 15-Jun-00 | 39.98 | 264.81 | KF735351 |          |                    |
| b3548   | KUNHM       | <i>Eremophila alpestris</i> | <i>alpestris</i> |           | 22-May-00 | 38.10 | 265.64 | KF735350 |          |                    |
| SVD2851 | BMUM        | <i>Eremophila alpestris</i> | <i>alpestris</i> |           | 18-Oct-02 | 47.50 | 266.42 | KF735477 |          |                    |
| SVD2852 | BMUM        | <i>Eremophila alpestris</i> | <i>alpestris</i> |           | 18-Oct-02 | 47.50 | 266.42 | KF735478 |          |                    |
| SVD2854 | BMUM        | <i>Eremophila alpestris</i> | <i>alpestris</i> |           |           | 45.03 | 267.08 | KF735479 |          |                    |
| T1775   | UMMZ        | <i>Eremophila alpestris</i> | <i>alpestris</i> |           | 11-Dec-93 | 45.56 | 275.32 | KF735488 |          |                    |
| HOLA12  | UGA         | <i>Eremophila alpestris</i> | <i>alpestris</i> | egg shell |           | 33.96 | 276.62 | KF735406 |          | KF735567, KF735568 |
| HOLA15  | UGA         | <i>Eremophila alpestris</i> | <i>alpestris</i> | egg shell |           | 33.96 | 276.62 | KF735407 |          |                    |
| HOLA17  | UGA         | <i>Eremophila alpestris</i> | <i>alpestris</i> | egg shell |           | 33.96 | 276.62 | KF735408 |          |                    |
| HOLA19  | UGA         | <i>Eremophila alpestris</i> | <i>alpestris</i> | egg shell |           | 33.96 | 276.62 | KF735409 |          |                    |
| HOLA22  | UGA         | <i>Eremophila alpestris</i> | <i>alpestris</i> | egg shell |           | 33.96 | 276.62 | KF735410 |          |                    |
| HOLA26  | UGA         | <i>Eremophila alpestris</i> | <i>alpestris</i> | egg shell |           | 33.96 | 276.62 | KF735411 |          | KF735569, KF735570 |
| HOLA32  | UGA         | <i>Eremophila alpestris</i> | <i>alpestris</i> | egg shell |           | 33.96 | 276.62 | KF735412 |          |                    |
| HOLA33  | UGA         | <i>Eremophila alpestris</i> | <i>alpestris</i> | egg shell |           | 33.96 | 276.62 | KF735413 |          |                    |
| HOLA40  | UGA         | <i>Eremophila alpestris</i> | <i>alpestris</i> | egg shell |           | 33.96 | 276.62 | KF735414 |          |                    |
| HOLA52  | UGA         | <i>Eremophila alpestris</i> | <i>alpestris</i> | egg shell |           | 33.96 | 276.62 | KF735415 |          |                    |
| HOLA72  | UGA         | <i>Eremophila alpestris</i> | <i>alpestris</i> | egg shell |           | 33.96 | 276.62 | KF735416 |          |                    |
| HOLA78  | UGA         | <i>Eremophila alpestris</i> | <i>alpestris</i> | egg shell |           | 33.96 | 276.62 | KF735417 |          |                    |
| HOLA97  | UGA         | <i>Eremophila alpestris</i> | <i>alpestris</i> | egg shell |           | 33.96 | 276.62 | KF735418 |          |                    |
| 1B446   | ROM         | <i>Eremophila alpestris</i> | <i>alpestris</i> |           |           | 43.65 | 280.62 | KF735335 |          |                    |
| 1B592   | ROM         | <i>Eremophila alpestris</i> | <i>alpestris</i> |           |           | 43.65 | 280.62 | KF735336 |          |                    |
| 1B593   | ROM         | <i>Eremophila alpestris</i> | <i>alpestris</i> |           |           | 43.65 | 280.62 | KF735337 |          |                    |



Appendix S1. Samples used in this study and GenBank accession numbers

| ID      | Institution | Species                     | mtDNA clade      | Sex | Date      | Lat.  | Lon.   | ND2      | ACO1               | RHO                |
|---------|-------------|-----------------------------|------------------|-----|-----------|-------|--------|----------|--------------------|--------------------|
| 1B769   | ROM         | <i>Eremophila alpestris</i> | <i>alpestris</i> |     |           | 43.65 | 280.62 | KF735338 |                    |                    |
| 1B771   | ROM         | <i>Eremophila alpestris</i> | <i>alpestris</i> | M   |           | 43.65 | 280.62 | KF735339 | KF735306, KF735307 | KF735515, KF735516 |
| SVD2384 | UWBM 68259  | <i>Eremophila alpestris</i> | <i>alpestris</i> | M   | 15-Mar-92 | 42.67 | 283.46 | KF735476 | KF735308, KF735309 | KF735609, KF735610 |
| SVD2361 | UWBM 68254  | <i>Eremophila alpestris</i> | <i>alpestris</i> | F   | 16-Aug-00 | 46.66 | 306.93 | KF735473 | KF735310           | KF735605, KF735606 |
| SVD2362 | UWBM 68255  | <i>Eremophila alpestris</i> | <i>alpestris</i> | F   | 16-Aug-00 | 46.66 | 306.93 | KF735474 |                    | KF735607, KF735608 |
| SVD2363 | UWBM 68253  | <i>Eremophila alpestris</i> | <i>alpestris</i> |     | 16-Aug-00 | 46.66 | 306.93 | KF735475 |                    |                    |
